# Supplementary material for: Atomistic structures of 〈0001〉 tilt grain boundaries in a textured Mg thin film
Source: Royal Society of Chemistry journal article supplement (doi:10.1039/d2nr05505h), 2022-01-01
Supplement: d2nr05505h1.pdf [file d2nr05505h1.pdf]

## Electronic Supplementary Information (ESI) on the manuscript “Atomistic Structures of <0001> Tilt Grain Boundaries in a Textured Mg Thin Film”

Siyuan Zhang\*, Zhuocheng Xie, Philipp Keuter, Saba Ahmad, Lamy Abdellaoui, Xuyang Zhou, Niels Cautsaerts, Benjamin Breitbach, Shamsa Aliramaji, Sandra Korte-Kerzel, Marcus Hans, Jochen M. Schneider, Christina Scheu (\*Correspondence: siyuan.zhang@mpie.de)

**Table S1** List of supercell parameters and GB energy from atomistic simulations.

| $\Sigma$ | $\theta$ (°) | $L_x$ (nm) | $L_y$ (nm) | $L_z$ (nm) | No. atoms | $E_{GB}$ (mJ/m <sup>2</sup> ) |
|----------|--------------|------------|------------|------------|-----------|-------------------------------|
| 31       | 17.90        | 42.7       | 6.2        | 1.6        | 17,856    | 243                           |
| 31       | 42.10        | 37.0       | 1.8        | 1.6        | 4,464     | 274                           |
| 37       | 9.43         | 40.4       | 3.9        | 1.6        | 10,656    | 176                           |
| 37       | 50.57        | 39.0       | 6.8        | 1.6        | 17,760    | 199                           |
| 61       | 7.34         | 51.9       | 5.0        | 1.6        | 17,568    | 153                           |
| 61       | 52.66        | 40.0       | 4.3        | 1.6        | 11,712    | 173                           |
| 73       | 11.64        | 43.7       | 9.5        | 1.6        | 28,032    | 197                           |
| 73       | 48.36        | 37.8       | 5.5        | 1.6        | 14,016    | 222                           |

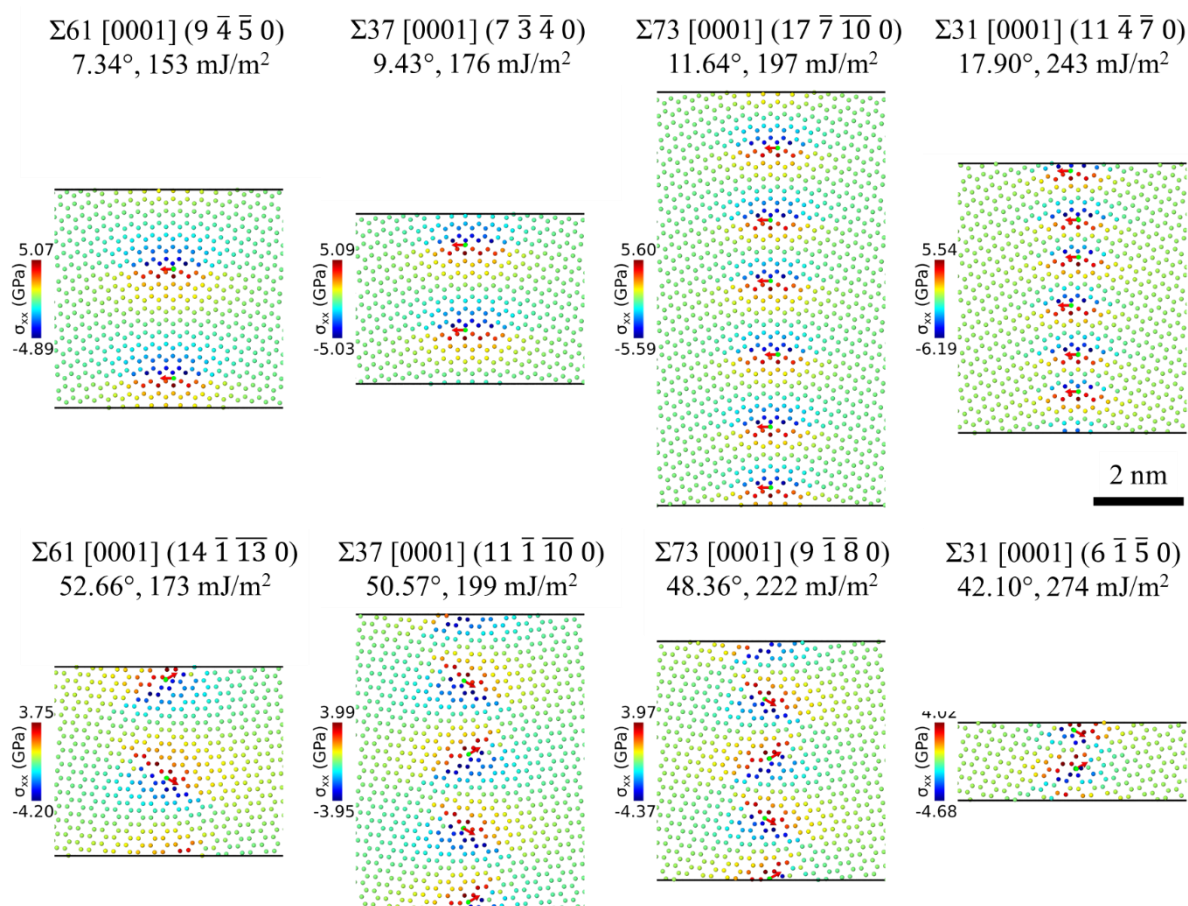

**Fig. S1** Atomic configurations of relaxed simulation cells for type-1 (upper row) and type-2 (lower row)  $\Sigma 61$ ,  $\Sigma 37$ ,  $\Sigma 73$ ,  $\Sigma 31$  [0001] tilt GBs. Color codes denote the stress field along  $x$ . Dislocation lines parallel to the viewing direction are colored in green and overlaid Burgers vectors  $\mathbf{b} = \frac{1}{3}\langle 2\bar{1}10 \rangle$  are indicated using red arrows.
